# Supplementary material for: Usability of a mHealth Solution using Speech Recognition for Point-of-care Diagnostic Management
Source: Springer Nature journal article supplement (doi:10.1007/s10916-022-01896-y), 2023-02-02
Supplement: MOESM1 [file 23984152]

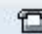

Med. Informationen

Allgemeine med. Daten

Kurzanamnese

Schwanger  Woche

Infektionsgrad

Diagnose

Fragestellung

Bemerkung

DZ.PTM-Projekt: Anforderung aus Diktat übernommen

Läuft im KLH

Ze 1, Sp 1

Ze 1 - Ze 3 von 3 Zeilen

| Pos | Auftragstyp          | Beh. OE | Fachl. OE | Status    | Vkg                                 | Datum/Uhrzeit/Zyklus | Fall                                                                                           |
|-----|----------------------|---------|-----------|-----------|-------------------------------------|----------------------|------------------------------------------------------------------------------------------------|
| 1   | Computer-Tomographie | 229152  | 2200      | 1 Erfasst | <input checked="" type="checkbox"/> | 02.08.2022           | <input type="text"/> <input type="button" value="Besuch"/> <input type="button" value="Fall"/> |

Untersuchung

Zusatzinfo

Mögliche Kontraindikationen

Metallimplantate

Schrittmacher

Allergie auf Kontrastmittel

jodhaltige  andere

Radiologische Patientendaten

Körpergröße  Gewicht in kg

Röntgenpass

Leistungen

| Leistung  | Leistungsbezeichnung         | Meng | Stat... | L... | N                        | Ergänzender Text | T... | N...                     | P |
|-----------|------------------------------|------|---------|------|--------------------------|------------------|------|--------------------------|---|
| RCTAKKO12 | AKUT Thorax - Abdomen        | 1    | UAN     |      | <input type="checkbox"/> |                  |      | <input type="checkbox"/> |   |
| RCTSCHG   | Schädel allgemein            | 1    | UAN     |      | <input type="checkbox"/> |                  |      | <input type="checkbox"/> |   |
| RCTANHG   | CTA Halsgefäße (supraaortal) | 1    | UAN     |      | <input type="checkbox"/> |                  |      | <input type="checkbox"/> |   |
